# THE AMERICAN JOURNAL OF PSYCHIATRY

---

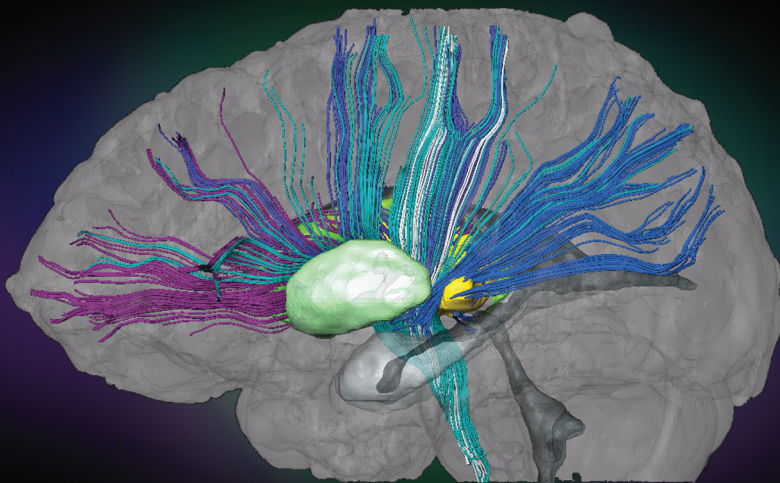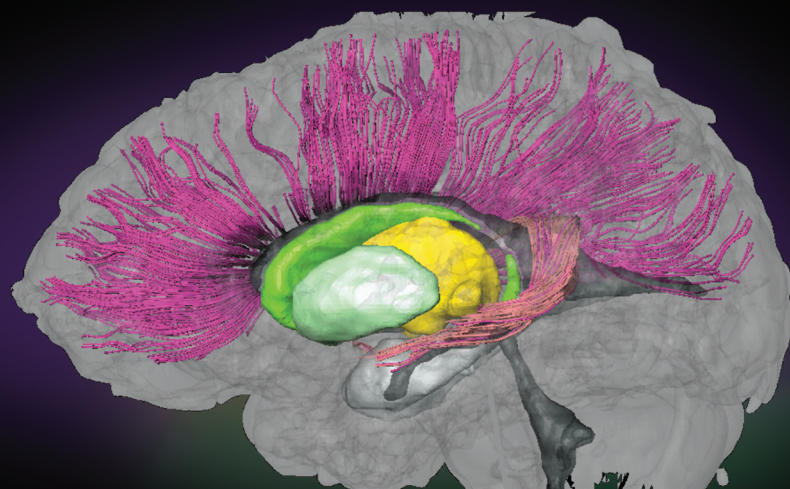

**Early Psychosocial Intervention  
Following Traumatic Events**  
Jonathan I. Bisson et al 1016

**Suicide Attempts Among Patients  
Starting Depression Treatment With  
Medications or Psychotherapy**  
Gregory E. Simon and James Savarino 1029

**Relative Glucose Metabolic Rate  
Higher in White Matter in Patients  
With Schizophrenia**  
Monte S. Buchsbaum et al. 1072

**Volumetric White Matter  
Abnormalities in First-Episode  
Schizophrenia: A Longitudinal,  
Tensor-Based Morphometry Study**  
Thomas J. Whitford et al. 1082

**Continuing Medical Education** 1130

**July 2007**

**Volume 164 • Number 7**

---

Official Journal of the  
AMERICAN PSYCHIATRIC ASSOCIATION

---

[ajp.psychiatryonline.org](http://ajp.psychiatryonline.org)
