# THE AMERICAN JOURNAL OF PSYCHIATRY

## EDITOR-IN-CHIEF

Robert Freedman, M.D.

## DEPUTY EDITORS

David A. Lewis, M.D.

Robert Michels, M.D.

Daniel S. Pine, M.D.

Susan K. Schultz, M.D.

Carol A. Tamminga, M.D.

## EDITORIAL STAFF

### Editorial Director

Michael D. Roy

### Senior Editor/Features Writer

Jane Weaver, E.L.S.

### Senior Editors

John J. Guardiano, Ph.D.  
Leannah M. Harding, M.S., E.L.S.

### Assistant Editors

Lisa Devine  
Angela Moore

### Production Editor

Julie C. Blair

### Senior Graphic Designer

Jason Glance

### Editorial Manager

Molly Douglas

### Editorial Assistant

Astewaye Yigzaw

### Assistants to the Editors

Lois Campbell  
Keriann Hansen  
Rachel Hogg  
Russell A. Scholl

## ASSOCIATE EDITORS

Wade H. Berrettini, M.D., Ph.D.

Kathleen T. Brady, M.D., Ph.D.

David P. Brent, M.D.

Linda Brzustowicz, M.D.

Cameron S. Carter, M.D.

Leon Eisenberg, M.D.

Glen O. Gabbard, M.D.

Howard H. Goldman,  
M.D., Ph.D.

Jeffrey A. Lieberman, M.D.

Robert C. Malenka, M.D., Ph.D.

Maria A. Oquendo, M.D.

Barbara L. Parry, M.D.

Jerrold F. Rosenbaum, M.D.

Larry J. Siever, M.D.

Patricia Suppes, M.D., Ph.D.

Myrna M. Weissman, Ph.D.

## EDITORS EMERITI

Nancy C. Andreasen,  
M.D., Ph.D.

John C. Nemiah, M.D.

## FORMER EDITORS

Amariah Brigham, M.D.  
1844-1849

T. Romeyn Beck, M.D.  
1849-1854

John P. Gray, M.D.  
1854-1886

G. Alder Blumer, M.D.  
1886-1894

Richard Dewey, M.D.  
1894-1897

Henry M. Hurd, M.D.  
1897-1904

Edward N. Brush, M.D.  
1904-1931

Clarence B. Farrar, M.D.  
1931-1965

Francis J. Braceland, M.D.  
1965-1978

The American Journal of Psychiatry is online at [ajp.psychiatryonline.org](http://ajp.psychiatryonline.org)

# THE AMERICAN PSYCHIATRIC ASSOCIATION

1000 Wilson Blvd., Suite 1825, Arlington, VA 22209-3901  
(888) 357-7924 (toll-free inside the U.S. and Canada) / (703) 907-7300  
web site: [www.psych.org](http://www.psych.org) / e-mail: [apa@psych.org](mailto:apa@psych.org)

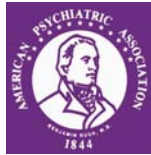

## OFFICERS 2007–2008

|                            |                                |
|----------------------------|--------------------------------|
| <b>President</b>           | Carolyn B. Robinowitz, M.D.    |
| <b>President-Elect</b>     | Nada L. Stotland, M.D., M.P.H. |
| <b>Vice-President</b>      | Carol Bernstein, M.D.          |
| <b>Secretary-Treasurer</b> | Donna M. Norris, M.D.          |

## ASSEMBLY

|                      |                      |
|----------------------|----------------------|
| <b>Speaker</b>       | Jeffrey Akaka, M.D.  |
| <b>Speaker-Elect</b> | Ronald M. Burd, M.D. |
| <b>Recorder</b>      | Gary Weinstein, M.D. |

## MEDICAL DIRECTOR'S OFFICE

|                                                                               |                                   |
|-------------------------------------------------------------------------------|-----------------------------------|
| <b>Medical Director</b>                                                       | James Scully, M.D.                |
| <b>Chief Executive Officer,<br/>American Psychiatric<br/>Publishing, Inc.</b> | Ronald E. McMillen                |
| <b>Executive Director,<br/>APIRE<br/>Division of Research</b>                 | Darrel A. Regier, M.D.,<br>M.P.H. |

## BOARD OF TRUSTEES

|                                    |                                |
|------------------------------------|--------------------------------|
| Thomas K. Ciesla, M.D.             | Steven S. Sharfstein, M.D.     |
| Mary Helen Davis, M.D.             | Anne Marie T. Sullivan, M.D.   |
| David Fassler, M.D.                | John Chapman Urbaitis,<br>M.D. |
| Jeffrey L. Geller, M.D.,<br>M.P.H. | Amy M. Ursano, M.D.            |
| Roger Peele, M.D.                  | Sidney H. Weissman, M.D.       |
| Michelle B. Riba, M.D., M.S.       | William M. Womack, M.D.        |
| Pedro Ruiz, M.D.                   |                                |

## AMERICAN PSYCHIATRIC PUBLISHING, INC.

### BOARD OF DIRECTORS 2006–2009

|                            |                                         |
|----------------------------|-----------------------------------------|
| <b>President and Chair</b> | Alan F. Schatzberg, M.D.                |
| <b>Secretary</b>           | Katharine Phillips, M.D.                |
| <b>Treasurer</b>           | Nada L. Stotland, M.D.,<br>M.P.H.       |
| Dwight L. Evans, M.D.      | Laura W. Roberts, M.D.                  |
| Joan A. Lang, M.D.         | Donna E. Stewart, M.D.,<br>F.R.C.P.(C.) |
| John M. Oldham, M.D.       |                                         |

### EX-OFFICIO MEMBERS

|                                                  |                                |
|--------------------------------------------------|--------------------------------|
| <b>APA President</b>                             | Carolyn B. Robinowitz, M.D.    |
| <b>APA President Elect</b>                       | Nada L. Stotland, M.D., M.P.H. |
| <b>APA Secretary-Treasurer</b>                   | Donna M. Norris, M.D.          |
| <b>APA Medical Director</b>                      | James Scully, M.D.             |
| <b>Editor-in-Chief,<br/>Psychiatric Services</b> | Howard Goldman, M.D.           |
| <b>Editor-in-Chief, Books</b>                    | Robert E. Hales, M.D., M.B.A.  |

The American Journal of Psychiatry is online at [ajp.psychiatryonline.org](http://ajp.psychiatryonline.org)

**THE AMERICAN PSYCHIATRIC ASSOCIATION**  
**Chairpersons of Councils, Commissions, Committees, and Task Forces**

**Standing Committees**

*Audit*

Donna M. Norris, M.D.

*Finance and Budget*

Jack W. Bonner III, M.D.

*Bylaws*

Ramaswamy Viswanathan, M.D.

*Elections*

Maria T. Lymberis, M.D.

*Ethics*

Wade C. Myers, M.D.

*Executive and Officer Compensation*

Allan Tasman, M.D.

*Investment Oversight*

John G. Looney, M.D.

*Joint Reference*

Carolyn B. Robinowitz, M.D.

*Membership*

Joseph Ezra V. Rubin, M.D.

*Nominating*

Steven S. Sharfstein, M.D.

*Tellers*

Billy E. Jones, M.D.

**Council on  
Addiction Psychiatry**

Eric C. Strain, M.D.

*Training and Education  
in Addiction Psychiatry*

John A. Renner, Jr., M.D.

*Treatment Services for Patients  
With Addictive Disorders*

Petros Levounis, M.D.

**Council on Advocacy  
and Public Policy**

Roger D. Walker, M.D.

*Committee on Government Relations*

Barry P. Perlman, M.D.

*Committee on Public Affairs*

C. Deborah Cross, M.D.

*Committee on Advocacy  
and Litigation Funding*

Jeffrey Stuart Janofsky, M.D.

**Council on Aging**

Frank W. Brown, M.D.

*Access and Effectiveness of  
Psychiatric Services for the Elderly*

David A. Casey, M.D.

*Ethnic Minority Elderly*

Maria D. Llorente, M.D.

*Long-Term Care and  
Treatment for the Elderly*

Helen Hisae Kyomen, M.D.

**Council on Children,  
Adolescents, and Their  
Families**

David A. Mrazek, M.D.

*Developmental Disabilities*

Joel D. Bregman, M.D.

*Family Violence and Abuse*

Yvonne B. Ferguson, M.D.

*Blanche F. Ittleson Research Award*

Elizabeth B. Weller, M.D.

*Juvenile Justice Issues*

Stephen B. Billick, M.D.

*Agnes Purcell McGavin Award*

John E. Schowalter, M.D.

*Infancy and Early Childhood*

Jean M. Thomas, M.D.

*Mental Health and Schools*

Marcia J. Slattery, M.D.

**Council on  
Global Psychiatry**

Rodrigo A. Munoz, M.D.

*Misuse and Abuse of Psychiatry*

Alan A. Stone, M.D.

*Psychiatric Dimensions of Disasters*

S. Arshad Husain, M.D.

**Council on Healthcare  
Systems and Financing**

Bruce J. Schwartz, M.D.

*APA/Business Relations*

Alan Langlieb, M.D.

*Managed Care*

Paul Henry Wick, M.D.

*Medicare Advisory*

Edward Gordon, M.D.

*Private Practice*

Frederick M. Jacobsen, M.D.

*Psychiatry in the Workplace*

Andrea G. Stolar, M.D.

*Public Funding for Psychiatric  
Services*

Selby C. Jacobs, M.D.

*Reimbursement for Psychiatric Care*

Joseph T. English, M.D.

*RBRVS, Codes and Reimbursement*

Ronald M. Burd, M.D.

**Council on  
Medical Education  
and Lifelong Learning**

Sandra Sexson, M.D.

*APA/Bristol-Myers Squibb  
Fellowship Selection*

David W. Preven, M.D.

*APA/SAMHSA Minority Fellowship  
Selection and Advisory*

Tana Annette Grady-Weliky, M.D.

*APA/GlaxoSmithKline  
Fellowship Selection and Program*

Leah Joan Dickstein, M.D.

*APA/Lilly Products  
Resident Research Award*

Charles L. Bowden, M.D.

*CME/Lifelong Learning*

David Bruce Mallott, M.D.

*Commercial Support*

Spencer Eth, M.D.

*History and Library*

Avram H. Mack, M.D.

*Medical Student Education*

Linda F. Pessar, M.D.

*Psychiatric Administration  
and Management*

L. Mark Russakoff, M.D.

*Residents and Fellows*

Lea E. DeFrancisci, M.D.

*Scientific Program*

Marian I. Butterfield, M.D.

*Scientific Program Committee of the  
Institute on Psychiatric Services*

Charles W. Huffine, M.D.

*Vestermark Award*

Kailie R. Shaw, M.D.

**Council on Member and  
District Branch Relations**

Michael J. Vergare, M.D.

*Distinguished Service Award*

Pedro Ruiz, M.D.

*Physician Health, Illness  
and Impairment*

John Fromson, M.D.

*Ad Hoc Work Group  
on Information Systems*

Robert C. Hsiung, M.D.

**Council on Minority Health  
and Health Disparities**

Francis G. Lu, M.D.

*American Indian, Alaska Native and  
Native Hawaiian Psychiatrists*

Daniel L. Dickerson, D.O.

*Asian-American Psychiatrists*

Surinder S. Nand, M.D.

*Black Psychiatrists*

Michele Reid, M.D.

*Gay, Lesbian, and Bisexual Issues*

Serena Volpp, M.D.

*Hispanic Psychiatrists*

Andres J. Pumariega, M.D.

*International Medical Graduates*

Sanjay Dube, M.D.

*Religion, Spirituality, and Psychiatry*

John Raymond Peteet, M.D.

*Women*

Melva J. Green, M.D.

**Council on  
Psychiatry And Law**

Paul S. Appelbaum, M.D.

*Confidentiality*

Jerome Howard Rogoff, M.D.

*Judicial Action*

Jeffrey L. Metzner, M.D.

*Manfred S. Guttmacher Award*

Patricia R. Recupero, M.D., J.D.

*Isaac Ray Award*

J. Richard Ciccone, M.D.

**Council on Psychosomatic  
Medicine**

Thomas N. Wise, M.D.

*Education and Training*

Mary Jane Massie, M.D.

*Research*

Constantine G. Lyketsos, M.D.

**Council on Quality Care**

Daniel K. Winstead, M.D.

*HIV/AIDS*

Francisco Fernandez, M.D.

*Electronic Health Records*

Farrell H. Brazier, M.D.

*Psychotherapy by Psychiatrists*

Eric Martin Plakun, M.D.

*Quality Indicators*

Marvin I. Herz, M.D.

*Standards and Survey Procedures*

Jeanne L. Steiner, D.O.

*Steering Committee on Practice  
Guidelines*

John S. McIntyre, M.D.

*Patient Safety*

Alfred Herzog, M.D.

**Council on Research**

Jeffrey A. Lieberman, M.D.

*Electroconvulsive and Other  
Electromagnetic Therapies*

Sarah H. Lisanby, M.D.

*Health Services Research*

Javier I. Escobar, M.D.

*Psychiatric Diagnosis  
and Assessment*

Michael B. First, M.D.

*Research Awards*

Stuart C. Yudofsky, M.D.

*Research on Psychiatric Treatments*

Jeffrey A. Lieberman, M.D.

*Research Training*

Charles B. Nemeroff, M.D.

**Council on Social Issues  
and Public Psychiatry**

Jagannathan Srinivasaraghavan, M.D.

*Poverty, Homelessness,  
and Psychiatric Disorders*

Jeffrey Gress Stovall, M.D.

*Psychiatric Services  
Achievement Awards*

Jacqueline Maus Feldman, M.D.

*Jails and Prisons*

Henry C. Weinstein, M.D.
