# THE AMERICAN JOURNAL OF PSYCHIATRY

---

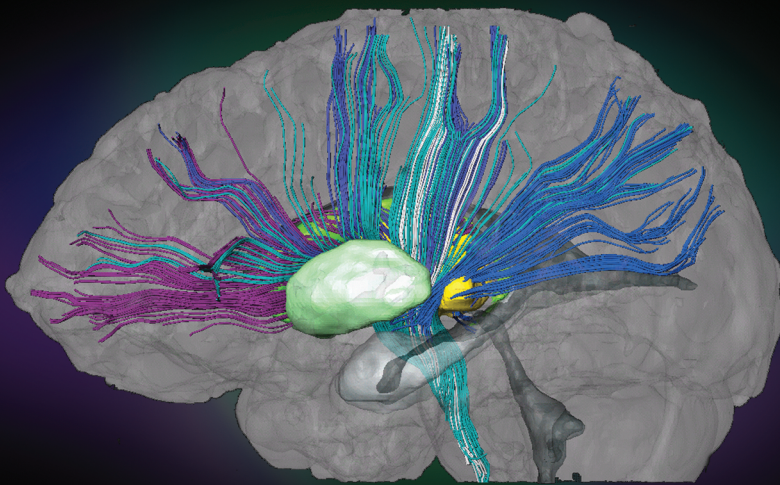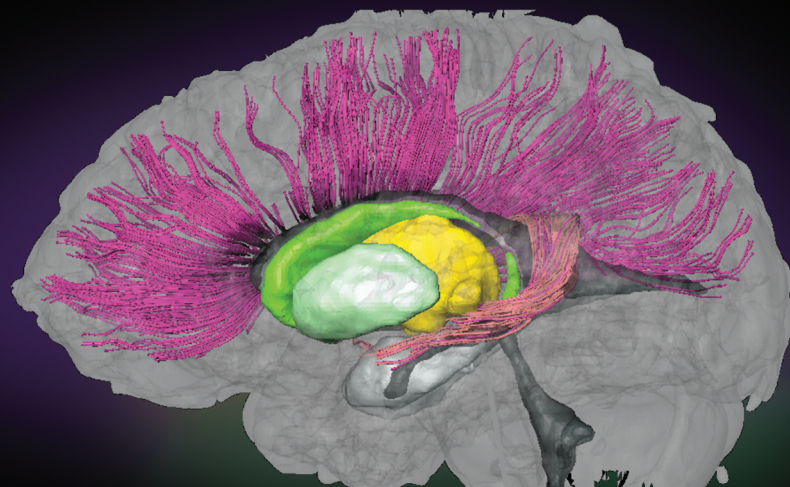

**Early Psychosocial Intervention  
Following Traumatic Events**  
Jonathan I. Bisson et al 1016

**Suicide Attempts Among Patients  
Starting Depression Treatment With  
Medications or Psychotherapy**  
Gregory E. Simon and James Savarino 1029

**Relative Glucose Metabolic Rate  
Higher in White Matter in Patients  
With Schizophrenia**  
Monte S. Buchsbaum et al. 1072

**Volumetric White Matter  
Abnormalities in First-Episode  
Schizophrenia: A Longitudinal,  
Tensor-Based Morphometry Study**  
Thomas J. Whitford et al. 1082

**Continuing Medical Education** 1130

**July 2007**

**Volume 164 • Number 7**

---

Official Journal of the  
AMERICAN PSYCHIATRIC ASSOCIATION

---

[ajp.psychiatryonline.org](http://ajp.psychiatryonline.org)

# THE AMERICAN JOURNAL OF PSYCHIATRY

Official Journal of the American Psychiatric Association

## Instructions for Activating Your Online Subscription

All subscribers to the print edition of *The American Journal of Psychiatry* are automatically eligible to view the *Journal* online. The online version of the *Journal* allows you to conduct searches for topics of interest in issues going all the way back to 1844. Plus the only way readers can participate in the *Journal's* new CME Course program is to have an activated online subscription (note: there is an additional annual fee to be enrolled and eligible to receive up to 36 hours of category 1 CME credit).

To activate your online subscription:

Make sure you have your customer identification number available. This number is printed on your *Journal* mailing label, directly above your name and address. If you cannot locate this number, please contact American Psychiatric Publishing, Inc., through one of the following methods:

- e-mail: [accessnumber@psych.org](mailto:accessnumber@psych.org)
- phone: (800) 368-5777
- fax: (703) 907-1091
- mail:

American Psychiatric Publishing, Inc.  
1000 Wilson Blvd., Suite 1825  
Arlington, VA 22209-3901  
Attn: Circulation Department.

Internet: <http://www.psychiatryonline.org>. Click on the "Subscriptions" button located near the bottom of the page. Then click on the appropriate link:

- ACTIVATE Your Member or Individual (Nonmember) Subscription

For APA Members, you will find your member number on the mailing label above your name. It is

a 10-digit number beginning with zeros. Enter your number in the box and click the SUBMIT button.

For Individual Nonmembers and Institutions, your customer number is on the mailing label above your name. It is a 10-digit number beginning with 22 or 30. Enter this number in the box and click the SUBMIT button.

Fill out all the information on the next screen and press the "Send Form" button at the bottom on the right.

When finished, click the "Done" button. You will receive an e-mail confirmation that your subscription has been activated.

**Continuing Medical Education:** You now have an opportunity to earn CME credits by reading articles in *The American Journal of Psychiatry*. Three articles in each issue will each comprise a short course for up to 1 hour category 1 CME credit each. The course comprises reading the article and answering three multiple-choice questions with a single correct answer. CME Credit is issued only online. Readers who want credit must subscribe to the AJP Continuing Medical Education Course program (APA Members: \$97.00 per year; Nonmember subscribers: \$144.00 per year; nonmember nonsubscribers: \$180.00 per year). Go to [cme.psychiatryonline.org](http://cme.psychiatryonline.org), select *The American Journal of Psychiatry* at that site, take the course(s) of your choosing, complete the evaluation form, and submit your answers for CME credit. In the online course, correct answers will be highlighted for your reference; there is no minimum threshold score necessary for the credit. A link from the question to the correct answer in context will be highlighted in the associated article. A certificate for each course will be generated upon successful completion.

The American Journal of Psychiatry is online at [ajp.psychiatryonline.org](http://ajp.psychiatryonline.org)

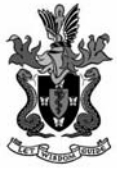

# THE BRITISH JOURNAL OF PSYCHIATRY

June 2007, VOL. 190

<http://bjp.rcpsych.org>

A20 Editorial Board

A21 Highlights of this issue

A22 Psychiatry in pictures

## EDITORIALS

457 **Disgust and psychiatric illness: have we remembered?**

B.O. Olatunji and D. McKay

## PAPERS

460 **Effects of antidepressant treatment following myocardial infarction**

J.P. van Melle, P. de Jonge, A. Honig, A.H. Schene, A.M.G. Kuyper, H.J.G. M. Crijns, A. Schins, D. Tulner, M.P. van den Berg, and J. Ormel  
on behalf of the MIND—IT investigators

467 **Does treating depression improve survival after acute coronary syndrome? Invited commentary**

R.M. Carney and K.E. Freedland

469 **Length of gestation and depressive symptoms at age 60 years**

K. Räikkönen, A.-K. Pesonen, E. Kajantie, K. Heinonen, T. Forsén, D.I.W. Phillips, C. Osmond, D.J.P. Barker, and J.G. Eriksson

475 **Anxiety, post-traumatic stress disorder and depression in Korean War veterans 50 years after the war**

J.F. Ikin, M.R. Sim, D.P. McKenzie, K.W.A. Horsley, E.J. Wilson, M.R. Moore, P. Jelfs, W.K. Harrex, and S. Henderson

484 **Explanations for the increase in mental health problems in UK reserve forces who have served in Iraq**

T. Browne, L. Hull, O. Horn, M. Jones, D. Murphy, N.T. Fear, N. Greenberg, C. French, R.J. Rona, S. Wessely, and M. Hotopf

490 **Genetic, environmental and gender influences on attachment disorder behaviours**

H. Minnis, J. Reekie, D. Young, T. O'Connor, A. Ronald, A. Gray, and R. Plomin

496 **Randomised controlled trial of inter-personal psychotherapy and cognitive—behavioural therapy for depression**

S.E. Luty, J.D. Carter, J.M. McKenzie, A.M. Rae, C.M.A. Frampton, R.T. Mulder, and P.R. Joyce

503 **Temperament, character and personality disorders as predictors of response to interpersonal psychotherapy and cognitive—behavioural therapy for depression**

P.R. Joyce, J.M. McKenzie, J.D. Carter, A.M. Rae, S.E. Luty, C.M.A. Frampton, and R.T. Mulder

509 **Comparison of outcomes following after-care from forensic and general adult psychiatric services**

J.W. Coid, N. Hickey, and M. Yang

515 **Substance use in a population-based clinic sample of people with first-episode psychosis**

J.H. Barnett, U. Werners, S.M. Secher, K.E. Hill, R. Brazil, K. Masson, D.E. Pernet, J.B. Kirkbride, G.K. Murray, E.T. Bullmore, and P.B. Jones

521 **Psychiatric disorders in Mexico: lifetime prevalence in a nationally representative sample**

M.E. Medina-Mora, G. Borges, C. Benjet, C. Lara, and P. Berglund

## SHORT REPORTS

529 **Neurocognitive basis of insight in schizophrenia**  
A. Mysore, R.W. Parks, K.-H. Lee, R.S. Bhaker, P. Birkett, and P.W.R. Woodruff

531 **Short-term antidepressant treatment and facial processing. Functional magnetic resonance imaging study**

R. Norbury, C.E. Mackay, P.J. Cowen, G.M. Goodwin, and C.J. Harmer

533 **Adjunctive fast repetitive transcranial magnetic stimulation in depression**

I.M. Anderson, N.A. Delvai, B. Ashim, S. Ashim, C. Lewin, V. Singh, D. Sturman, and P.L. Strickland

535 **Perceived stigma and depression among caregivers of patients with bipolar disorder**

D.A. Perlick, D.J. Miklowitz, B.G. Link, E. Struening, R. Kaczynski, J. Gonzalez, L.N. Manning, N. Wolff, and R.A. Rosenheck

## COLUMNS

537 Correspondence

538 One hundred years ago

540 Book reviews

543 Books received

544 Contents of the *American Journal of Psychiatry*

545 Contents of *Advances in Psychiatric Treatment*

546 From the Editor's desk

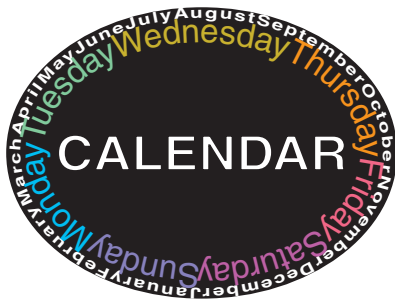

For free listing of your organization's official annual or regional meeting, please send us the following information: sponsor, location, inclusive dates, type and number of continuing education credits (if available), and the name, address, and telephone number of the person or group to contact for more information. In order for an event to appear in our listing, all notices and changes must be received at least 6 months in advance of the meeting and should be addressed to:

Calendar, American Journal of Psychiatry, 1000 Wilson Boulevard, Suite 1825, Arlington, VA 22209-3901, [jblair@psych.org](mailto:jblair@psych.org) (e-mail).

Because of space limitations, only listings of meetings of the greatest interest to Journal readers will be included.

## AUGUST

**August 25–29**, 13th International Congress of the European Society of Child and Adolescent Psychiatry, Florence, Italy. Contact: Escap Secretariat, Via Emilia Est, 421, Modena, Italy 41100; 39 059 4223052 (tel), 39 059 4222275 (fax), [info@escap-net.org](mailto:info@escap-net.org) (e-mail), <http://www.escap-net.org> (web site).

## SEPTEMBER

**September 9–12**, Annual meeting of the Society for the Study of Psychiatry and Culture (SSPC), (in cooperation with the World Psychiatric Association Transcultural Psychiatry Section and the World Association for Cultural Psychiatry), Stockholm, Sweden. Contact: Jim Boehnlein or Shannon Squire [sspcadmin@gmail.com](mailto:sspcadmin@gmail.com) (e-mail), [www.psychiatryandculture.org](http://www.psychiatryandculture.org) (web site).

## OCTOBER

**October 6–7**, 6th NYU Reproductive Psychiatry Conference, New York. Contact: Dr. Shari I. Lusskin, Director of Reproductive Psychiatry, New York University School of Medicine, 155 East 29th Street, Suite 26J, New York, NY 10016; (212) 263-5295 (tel), [www.med.nyu.edu/cme](http://www.med.nyu.edu/cme) (web site).

**October 7–11**, 15th World Congress on Psychiatric Genetics, New York. Contact: Lynn E DeLisi, International Society of Psychiatric Genetics, NYU School of Medicine, 650 First Avenue, 5th Floor Room 543, New York, NY 10016; (212) 263-3420 (tel), (212) 263-3407 (fax), [DeLisi76@AOL.com](mailto:DeLisi76@AOL.com) (e-mail), [www.WCPG2007.com](http://www.WCPG2007.com) (web site).

**October 11-14**, 59th Institute on Psychiatric Services, American Psychiatric Association, New Orleans, LA. Contact: Jill Gruber, APA Annual Meetings Dept.,

1000 Wilson Blvd., Ste. 1825, Arlington, VA 22209; (703) 907-7815.

**October 23–28**, 54th Annual Meeting of the American Academy of Child and Adolescent Psychiatry, Boston. Contact: AACAP, 3615 Wisconsin Avenue, N.W., Washington, DC 20016-3007; (202) 966-7300 (tel), (202) 966-2891 (fax), [meetings@aacap.org](mailto:meetings@aacap.org) (e-mail), [www.aacap.org](http://www.aacap.org) (web site).

## DECEMBER

**December 8**, 4th annual Child Mental Health Symposium, Tucson, AZ. Contact: Professional Development Office, University of Arizona College of Medicine, Department of Psychiatry, PO Box 245002, 1501 N. Campbell Ave. #7423, Tucson, AZ 85724-5002; (520) 626-1392 (tel), (520) 626-5732 (fax), [uapsycon@email.arizona.edu](mailto:uapsycon@email.arizona.edu) (e-mail), [www.psychiatry.arizona.edu](http://www.psychiatry.arizona.edu) (web site).

## FEBRUARY 2008

**February 15–18**, 21st Annual Meeting of the American Association for Geriatric Psychiatry, Washington, DC. Contact: AAGP, 7910 Woodmont Ave., Ste. 1050, Bethesda, MD 20814-3004; (301) 654-7850 (tel), (301) 654-4137 (fax), [www.aagpmeeting.org](http://www.aagpmeeting.org) (web site).

**February 27–March 2**, Annual meeting of the American College of Psychiatrists, Kauai, Hawaii. Contact: American College of Psychiatrists, 122 S. Michigan Ave., Ste. 1360, Chicago, IL 60603; (312) 662-1020 (tel), (312) 662-1025 (fax), [maureen@acpsych.org](mailto:maureen@acpsych.org) (e-mail).

## MARCH

**March 14–17**, 21st Annual Meeting of the American Association for Geriatric Psychiatry, Orlando. Contact: AAGP, 7910 Woodmont Ave., Ste. 1050, Bethesda, MD

20814-3004; (301) 654-7850 (tel), (301) 654-4137 (fax), [www.aagpmeeting.org](http://www.aagpmeeting.org) (web site).

**March 15**, 7th Annual Women's Mental Health Symposium, Tucson, AZ. Contact: Professional Development Office, University of Arizona College of Medicine, Department of Psychiatry, PO Box 245002, 1501 N. Campbell Ave. #7423, Tucson, AZ 85724-5002; (520) 626-1392 (tel), (520) 626-5732 (fax), [uapsycon@email.arizona.edu](mailto:uapsycon@email.arizona.edu) (e-mail), [www.psychiatry.arizona.edu](http://www.psychiatry.arizona.edu) (web site).

**March 26–29**, Annual Meeting and Scientific Sessions of the Society of Behavioral Medicine, San Diego. Contact: Society of Behavioral Medicine, 17000 Commerce Parkway, Ste. C, Mount Laurel, NJ 08054; (856) 439-1297 (tel), (856) 439-0525 (fax), [info@sbm.org](mailto:info@sbm.org) (e-mail).

## MAY

**May 1–4**, The 52nd Annual Meeting of the American Academy of Psychoanalysis and Dynamic Psychiatry, Washington, DC. Contact: Executive Office, American Academy of Psychoanalysis and Dynamic Psychiatry, P. O. Box 30, Bloomfield, CT 06002; (888) 691-8281 (tel), (888) 286-0787 (fax), [aap@ssmgt.com](mailto:aap@ssmgt.com) (e-mail).

**May 3–4**, American Academy of Psychiatry and the Law Semiannual Meeting, Washington, D.C. Contact: One Regency Drive, PO Box 30, Bloomfield, CT 06002-0030; (800) 331-1389, (tel) (860) 286-0787 (fax), [execoff@aapl.org](mailto:execoff@aapl.org) (e-mail).

**May 3–8**, 161st Annual Meeting of the American Psychiatric Association, Washington, DC. Contact: Cathy Nash, APA Annual Meetings Dept., 1000 Wilson Blvd., Ste. 1825, Arlington, VA 22209; (703) 907-7822.

Continued on page A43



# Psychological Medicine

Volume 37 Number 6 June 2007

## CONTENTS

In this Issue 767

### REVIEW ARTICLES

**Can we predict suicide and non-fatal self-harm with the Beck Hopelessness Scale? A meta-analysis** MCMILLAN, D., GILBODY, S., BERESFORD, E. & NEILLY, L. 769

**Is bereavement-related depression different than non-bereavement-related depression?** ZISOOK, S., AND KENDLER, K.S. 779

### ORIGINAL ARTICLES

**The spectrum of suicidal ideation in Great Britain: comparisons across a 16-74 years age range** DENNIS, M., BAILLON, S., BRUGHA, T., LINDESAY, J., STEWART, R., AND MELTZER, H. 795

**Suicide ideation, plans and attempts in Ukraine: findings from the Ukraine World Mental Health Survey** BROMET, E.J., HAVENAAR, J.M., TINTLE, N., KOSTYUCHENKO, S., KOTOV, R., AND GLUZMAN, S. 807

**The profile and risks of suicidal behaviours in the Nigerian Survey of Mental Health and Well-Being** GUREJE, O., KOLA, L., UWAKWE, R., UDOFIA, O., WAKIL, A., AND AFOLABI, E. 821

**Suicide in current psychiatric in-patients: a case-control study** HUNT, I.M., KAPUR, N., WEBB, R., ROBINSON, J., BURNS, J., TURNBULL, P., SHAW, J., AND APPLEBY, L. 831

**Suicide and other causes of mortality in bipolar disorder: a longitudinal study** DUTTA, R., BOYDELL, J., KENNEDY, N., VAN OS, J., FEARON, P., AND MURRAY, R.M. 839

**Enhanced treatment for depression in primary care: long-term outcomes of a psycho-educational prevention program alone and enriched with psychiatric consultation or cognitive behavioral therapy** CONRADI, H.J., DE JONGE, P., KLUITER, H., SMIT, A., VAN DER MEER, K., JENNER, J.A., VAN OS, T.W.D.P., EMMELKAMP, P.M.G., AND ORMEL, J. 849

**Severe life events predict specific patterns of change in cognitive biases in major depression** MONROE, S.M., SLAVICH, G.M., TORRES, L.D., AND GOTLIB, I.H. 863

**An epidemiological investigation of affective disorders with a population-based cohort of 1023 adults with intellectual disabilities** COOPER, S.-A., SMILEY, E., MORRISON, J., WILLIAMSON, A., AND ALLAN, L. 873

**The long-term course of depressive disorders in the Lundby Study** MATTISSON, C., BOGREN, M., HORSTMANN, V., MUNK-JØRGENSEN, P., AND NETTELBLADT, P. 883

**Do characteristics of patients with major depressive disorder differ between primary and psychiatric care?** VUORILEHTO, M.S., MELARTIN, T.K., RYTSÄLÄ, H.J., AND ISOMETSÄ, E.T. 893

### BOOK REVIEWS

*Psychiatric Epidemiology. Searching for the Causes of Mental Disorders* JABLENSKY, A. AND MORGAN, V. 905

*Why Life Speeds Up As You Get Older* SIMONS, J.S. AND TETLOW-NOELL, C.E. 906

*Mental Disorders in Older Adults: Fundamentals of Assessment and Treatment* REIFLER, B.V. 907

*American Journal of Psychiatry Contents February 2007* 909

# New Feature for Residents!

## The American Journal of Psychiatry Residents' Journal

A FREE electronic publication produced specifically for psychiatry residents

The Residents' Journal contains special links to full text of the articles from the current *American Journal of Psychiatry* and to AJP Audio, a downloadable MP3 file featuring highlights from the issue. In addition, this e-mail bulletin contains two exclusive features:

### Journal Club Kit

A featured article presented with an overview discussing the reasons for its selection, discussion questions, and an editorial by a senior member of the field placing the article into clinical context.

### Educational Article

Case presentation that illustrates a major point in clinical practice or highlights unique treatment approaches.

Plus lively contributions from your fellow residents:

- Instructive cases
- Unique clinical or educational programs
- Perspectives on training and career development
- Discussions arising from journal club discussions

*The American Journal of Psychiatry*  
**Residents' Journal**  
June 2007: Volume 2, Issue 6

**Contents**

Promoting Healthier Relations With the Pharmaceutical Industry: A Resident-Driven Educational Model  
Jesus Salvador A. Ligot, MD 2

Second Annual Meeting of the Residents' Journal  
Focus Group 3

**Editors' Column**

Participating in the peer review process is a great way to gain experience in evaluating research articles and to learn how scientific publications make their way from the clinical setting to the printed page. Providing reviewer feedback is an extremely valuable service to the research community that you can feel good about doing, and the process permits participation among colleagues at all levels, from those most junior in their careers to the most senior of investigators.

It may seem overwhelming to review a paper from an established research group, particularly if the paper involves a complex technique or specialized analysis (e.g., neuroimaging or genetic studies). However, by following a structured approach, it is possible to compose a constructive and thoughtful review for most manuscripts. To help you accomplish this, we will walk you through an example review based on the hypothetical paper in the following scenario:

You are asked to review a manuscript that reports on an 8-week medication trial for generalized anxiety disorder (GAD). The study involves using a novel pharmacologic agent for the treatment of anxiety in 40 subjects receiving active treatment versus 40 comparison subjects receiving placebo. During the study, all participants undergo neuroimaging procedures before and after treatment that measure functional brain activity during an anxiety-provoking cognitive task. Changes in brain measures as well as symptom ratings are used to assess the effects of the medication.

As a potential reviewer for this manuscript, you may consider reviewing even if you are not an expert in both GAD and neuroimaging techniques. When you agree to do the review, it is appropriate to let the editor know that you are able to adequately assess the clinical aspects of the study, but other reviewers may need to supplement additional expertise in imaging, statistics, or other methodological aspects of the study.

*The American Journal of Psychiatry*, like most journals, offers a format to guide you in preparing your review. The format consists of the following six categories: 1) Summary, 2) Strengths of paper, 3) General conceptual or design problems, 4) Specific problems, 5) Areas needing more or less detailed coverage, and 6) Aspects requiring more qualification or more emphasis. We will examine each of these individual categories and discuss strategies for writing a critique based on the hypothetical manuscript described above.

At the start of each review it is helpful to reiterate in one or two sentences the main point of the study and the findings of the authors. While this may seem mundane, it can actually be fairly revealing. For example, if you are having trouble identifying the main point of a manuscript, then there may be problems with the focus of the paper as a whole, and you may be able to provide suggestions on presenting the work in a more concise manner. For our hypothetical manuscript, you could summarize the study in the following way: "This is a treatment trial for GAD using a novel medication that is assessed via neuroimaging techniques as well as clinical outcomes." At this point you might also state what the authors hypothesized they would find during the course of their study, such as a change in functional activity in a specific brain region and/or a change in scores on a specific clinical rating scale.

**Strengths of Paper**

The particular strengths of each manuscript will vary, but often here is where comments are made about the significance or scientific impact of the paper on the field. A journal is really a "diary" of the scientific progress of the field, so papers should offer some new insights or findings that represent a step forward. You may also wish to comment whether the findings in the study could lead to a new insight or perspective on existing treatment. For example, in the case of the GAD manuscript, it may be helpful to note that there are relatively few studies that examine treatments for GAD, and therefore the study is clinically significant. Furthermore, the neuroimaging techniques employed in this study may identify a new way to conceptualize the neurobiology of GAD, which would be a definite strength of the manuscript. If you do not have great expertise in GAD treatment or neurobiology, it is often helpful to conduct a search on PubMed or some other similar search engine to get a better sense of the topic and how this particular analysis fits in.

**General Conceptual or Design Problems**

In this section you may want to focus on the specific hypothesis being tested in the study. In our GAD example, the authors essentially are testing

The Resident's Journal is sent free-of-charge to all psychiatry residents. Anyone interested in being included on the distribution list should contact Lisa Devine, the Residents' Journal staff editor at [ajp@psych.org](mailto:ajp@psych.org) with "Subscribe to Residents' Journal" in the subject line.

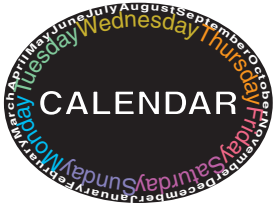

Continued from page A30

## JUNE

**June 19–21**, Thematic Conference on Depression and Relevant Psychiatric Condition in Primary Care, Granada, Spain. Contact: Francisco Torres-González, Andalusian Research Group on Mental Health, University of Granada, Avenida de Madrid 11, Granada 18071, Spain; (34) 958-272651 (tel), (34) 958-275214 (fax), ftorres@ugr.es (e-mail).

## OCTOBER

**October 2–5**, 60th Institute on Psychiatric Services, American Psychiatric Association, Chicago, IL. Contact: Jill Gruber, APA Annual Meetings Dept., 1000 Wilson Blvd., Ste. 1825, Arlington, VA 22209; (703) 907-7815.

**October 28–November 2**, 55th Annual Meeting of the American Academy of Child and Adolescent Psychiatry, Chicago. Contact: AACAP, 3615 Wisconsin Avenue, N.W., Washington, DC 20016-3007; (202) 966-7300 (tel), (202) 966-2891 (fax), meetings@aacap.org (e-mail), www.aacap.org (web site).

## NOVEMBER

**November 23–28**, Canadian Psychiatric Association 58th Annual Meeting, Vancouver, British Columbia, Canada. Contact: 260-441 MacLaren Street, Ot-

tawa, ON K2P 2H3, Canada; (800) 267-1555 (tel), (613) 234-9857 (fax), cpa@medical.org (e-mail).

## FEBRUARY 2009

**February 25–March 1**, American College of Psychiatrists Annual Meeting, Tucson, AZ. Contact: 122 South Michigan Avenue, Suite 1360, Chicago, IL 60603; (312) 662-1020 (tel), (312) 662-1025 (fax), angel@ACPsych.org (e-mail).

## MAY

**May 16–21**, 162nd Annual Meeting of the American Psychiatric Association, San Francisco. Contact: Cathy Nash, APA Annual Meetings Dept., 1000 Wilson Blvd., Ste. 1825, Arlington, VA 22209; (703) 907-7822.

## Coming in the August 2007 issue

### THE AMERICAN JOURNAL OF PSYCHIATRY

*A Longitudinal Study of the Use of Mental Health Services By Persons With Serious Mental Illness: Do Spanish-Speaking Latinos Differ From English-Speaking Latinos and Caucasians?*

D. Folsom, T. Gilmer, C. Barrio, D.J. Moore, J. Buccardo, L. Lindamer,  
P. Garcia, W. Hawthorne, R. Hough, T. Patterson, and D. Jeste

*Association of GRIK4 With Outcome of Antidepressant Treatment in the STAR\*D Cohort*

S. Paddock, G. Laje, D. Charney, J. Rush, A. Wilson, A. Sorant, R. Lipsky, S. Wisniewski, H. Manji, and F. McMahon

*Predictors of Attrition During Initial (Citalopram) Treatment for Depression: A STAR\*D Report*

D. Warden, M. Trivedi, S.R. Wisniewski, L. Davis, A. Nierenberg, B. Gaynes, S. Zisook,  
S. Hollon, G.K. Balasubramani, R. Howland, M. Fava, J. Stewart, and J. Rush

*Spillover Effects on Adult Depression Treatment in Primary Care After FDA Advisory on Suicidality Risk of SSRI Antidepressants Targeting Pediatric Patients With MDD*

R. Valuck, A. Libby, H. Orton, E. Morrato, R. Allen, and R. Baldessarini
